# Supplementary material
Source: publisher figshare collection journal article supplement (https://sage.figshare.com/ndownloader/files/16347518)
Supplement: Supplementary file 1 [file 16347518]

## Supplementary Appendix 2 – Coding Guide

| Code                | Explanation                                                                                                                                                                                                  |
|---------------------|--------------------------------------------------------------------------------------------------------------------------------------------------------------------------------------------------------------|
| Advice              | Mentions advice given by primary care provider in regards to smoking cessation or health risks                                                                                                               |
| Barriers - Internal | Reasons it's hard to quit within themselves- motivation, "not a good time," used to routines, discomfort with different treatment options.                                                                   |
| Barriers - External | Why it's hard to quit, reasons they cannot control- not close to the clinic/transportation, family members smoke around them, treatment barriers, difficulty with NRT, bad experiences with therapists, etc. |
| Facilitators        | Treatment and/or abstinence, anything that makes it easier/facilitates cessation                                                                                                                             |
| FamFriendsPos       | How family and friends impact their cessation <b>positively</b>                                                                                                                                              |
| FamFriendsNeg       | How family and friends impact their cessation <b>negatively</b>                                                                                                                                              |
| FormatPref          | Mention of preference or a treatment format- group or individual, phone or in person, etc.                                                                                                                   |
| Knowledge           | Mention of knowledge of the health effects of smoking, knowledge of how medications/NRT works                                                                                                                |
| Initiation          | Age of first cigarette, how they started smoking                                                                                                                                                             |
| MedPrefs            | Personal preferences of medications- types of NRT like patches, gum, lozenges, or bupropion, Chantix/varenicline                                                                                             |
| MentalHealth        | Mention of specific mental illnesses, or how smoking has impacted their mental health                                                                                                                        |
| MilitarySmoking     | History of smoking specifically while in the military- their experience or their perceptions of the culture                                                                                                  |
| Prenatal            | Any mention of smoking, quitting or struggling to quit while pregnant                                                                                                                                        |
| ProviderPrefs       | Discussion about an "ideal provider," who would be best equipped for smoking cessation care, what qualities would be desired or not desired                                                                  |
| Relapse             | Notes specific times they had quit and went back to smoking, reasons that led to relapse                                                                                                                     |
| Stigma              | Feeling bad about being a smoker, things they see in the media, treatment by others, etc.                                                                                                                    |
| TreatmentExper      | Treatment past experiences, common overlap with Barriers-treatment and Facilitators, experiences with smoking cessation meds and NRT                                                                         |
| Weight              | Addresses weight gain after cessation as a consideration                                                                                                                                                     |
| WomenTreatNO        | States they would NOT be in favor of smoking cessation resources specifically for women, include those completely indifferent/no preference                                                                  |
| WomenTreatYES       | States they would be in favor of smoking cessation resources specifically for women, include those who say "it depends"                                                                                      |
